# Supplementary material for: Clinical and pharmacoeconomic evaluation of fidaxomicin in patients over 65 years of age and immunocompromised patients with recurrent and refractory Clostridioides difficile infection
Source: Research Square preprint supplement (doi:10.21203/rs.3.rs-7445823/v1), 2025-09-26
Supplement: Supplementary file 1 [file 29f9e68f5a415a508c48d4f6.pdf]

**Supplementary Material** - Clinical and pharmacoeconomic evaluation of fidaxomicin in patients over 65 years of age and immunocompromised patients with recurrent and refractory *Clostridioides difficile* infection

## Recurrent *Clostridioides difficile* infection

**Table S1** Clinical outcome of patients with recurrent *Clostridioides difficile* infection

|                                                          | <b>Fidaxomicin group (n=110)</b> | <b>Vancomycin group (n=112)</b> | <b>p value</b>               |
|----------------------------------------------------------|----------------------------------|---------------------------------|------------------------------|
| <b>Days with CDI-associated diarrhea, median (IQR)</b>   | 4 (2-6)                          | 4 (2-6)                         | 0.203 <sup>a</sup>           |
| <b>Symptom reduction on day 10 of CDI therapy, n (%)</b> | 108 (98)                         | 95 (85)                         | <b>&lt;0.001<sup>b</sup></b> |
| <b>New CDI recurrence within 90 days, n (%)</b>          | 25 (23)                          | 47 (42)                         | <b>0.002<sup>b</sup></b>     |
| <b>90-day mortality, n (%)</b>                           | 13 (12)                          | 13 (12)                         | 0.899 <sup>b</sup>           |
| <b>Days of initial hospitalisation, median (IQR)</b>     | 20 (10-46)                       | 26 (11-54)                      | 0.361 <sup>a</sup>           |

Abbreviations: IQR, interquartile range; CDI, *Clostridioides difficile* infection

<sup>a</sup> Mann-Whitney U Test; <sup>b</sup> Pearson's chi square test

**Table S2** Direct treatment costs for patients with recurrent *Clostridioides difficile* infection in Euro

|                                                                                    | <b>Fidaxomicin group (n=110)</b> | <b>Vancomycin group (n=112)</b> | <b>p value</b>               |
|------------------------------------------------------------------------------------|----------------------------------|---------------------------------|------------------------------|
| <b>Hospitalisation costs<sup>l, b</sup>, n (%)</b>                                 | 79 (72)                          | 80 (71)                         | 0.949 <sup>d</sup>           |
| Costs per patient, mean (95% CI)                                                   | 19,364 (13,490-25,239)           | 18,619 (13,191-24,049)          | 0.872 <sup>a</sup>           |
| <b>Hospitalisation costs (Year 2024)</b>                                           |                                  |                                 |                              |
| Costs per patient, mean (95% CI)                                                   | 19,539 (14,257-24,821)           | 20,231 (14,729-25,733)          | 0.844 <sup>a</sup>           |
| <b>Overall recurrent/ refractory CDI drug acquisition costs<sup>c</sup>, n (%)</b> | 110 (100)                        | 110 (98)                        | 0.498 <sup>e</sup>           |
| Costs per patient, mean (95% CI)                                                   | 2,404 (2,228-2,591)              | 1,307 (1,085-1,543)             | <b>&lt;0.001<sup>a</sup></b> |
| <b>Overall direct treatment costs<sup>b, c</sup>, n (%)</b>                        | 110 (100)                        | 112 (100)                       | -                            |
| Costs per patient, mean (95% CI)                                                   | 16,311 (11,749-20,873)           | 14,583 (10,443-18,723)          | 0.593 <sup>a</sup>           |
| <b>Overall direct treatment costs (Year 2024)</b>                                  |                                  |                                 |                              |
| Costs per patient, mean (95% CI)                                                   | 16,437 (12,254-20,619)           | 15,734 (11,493-19,976)          | 0.826 <sup>a</sup>           |

Abbreviations: CI, Confidence interval; CDI, *Clostridioides difficile* infection

<sup>l</sup> n-values differ due to missing data; <sup>a</sup> Bootstrapped t-test (independent samples, two sided); <sup>b</sup> Based on G-DRGs from 2013 to 2023; <sup>c</sup> Based on Rote Liste® prices from 2024; <sup>d</sup> Pearson chi-square test (two-tailed); <sup>e</sup> Fisher's exact test

## Refractory *Clostridioides difficile* infection

**Table S3** Clinical outcome of patients with refractory *Clostridioides difficile* infection

|                                                          | Fidaxomicin group (n=62) | Vancomycin group (n=61) | p value            |
|----------------------------------------------------------|--------------------------|-------------------------|--------------------|
| <b>Days with CDI-associated diarrhea, median (IQR)</b>   | 8 (5-10)                 | 6 (4-12)                | 0.488 <sup>a</sup> |
| <b>Symptom reduction on day 10 of CDI therapy, n (%)</b> | 55 (89)                  | 52 (85)                 | 0.648 <sup>b</sup> |
| <b>New CDI recurrence within 90 days, n (%)</b>          | 11 (18)                  | 17 (28)                 | 0.181 <sup>b</sup> |
| <b>90-day mortality, n (%)</b>                           | 12 (19)                  | 9 (15)                  | 0.497 <sup>b</sup> |
| <b>Days of initial hospitalisation, median (IQR)</b>     | 40 (28-65)               | 37 (25-49)              | 0.191 <sup>a</sup> |

Abbreviations: IQR, interquartile range; CDI, *Clostridioides difficile* infection

<sup>a</sup> Mann-Whitney U Test; <sup>b</sup> Pearson's chi square test

**Table S4** Direct treatment costs for patients with refractory *Clostridioides difficile* infection in Euro

|                                                                                    | Fidaxomicin group (n=62) | Vancomycin group (n=61) | p value                      |
|------------------------------------------------------------------------------------|--------------------------|-------------------------|------------------------------|
| <b>Hospitalisation costs<sup>l, b</sup>, n (%)</b>                                 | 53 (85)                  | 55 (90)                 | 0.428 <sup>d</sup>           |
| Costs per patient, mean (95% CI)                                                   | 19,694 (13,650-25,738)   | 19,487 (14,617-24,356)  | 0.960 <sup>a</sup>           |
| <b>Hospitalisation costs (Year 2024)</b>                                           |                          |                         |                              |
| Costs per patient, mean (95% CI)                                                   | 20,662 (15,334-25,990)   | 20,330 (16,219-24,440)  | 0.924 <sup>a</sup>           |
| <b>Overall recurrent/ refractory CDI drug acquisition costs<sup>c</sup>, n (%)</b> | 62 (100)                 | 60 (98)                 | 0.496 <sup>e</sup>           |
| Costs per patient, mean (95% CI)                                                   | 2,412 (2,126-2,794)      | 1,164 (876-1,519)       | <b>&lt;0.001<sup>a</sup></b> |
| <b>Overall direct treatment costs<sup>b, c</sup>, n (%)</b>                        | 62 (100)                 | 61 (100)                | -                            |
| Costs per patient, mean (95% CI)                                                   | 19,247 (13,822-24,672)   | 18,715 (14,102-23,328)  | 0.870 <sup>a</sup>           |
| <b>Overall direct treatment costs (Year 2024)</b>                                  |                          |                         |                              |
| Costs per patient, mean (95% CI)                                                   | 20,074 (15,197-24,951)   | 19,475 (15,438-23,512)  | 0.841 <sup>a</sup>           |

Abbreviations: CI, Confidence interval; CDI, *Clostridioides difficile* infection

<sup>l</sup> n-values differ due to missing data; <sup>a</sup> Bootstrapped t-test (independent samples, two sided); <sup>b</sup> Based on G-DRGs from 2013 to 2023; <sup>c</sup> Based on Rote Liste® prices from 2024; <sup>d</sup> Pearson chi-square test (two-tailed); <sup>e</sup> Fisher's exact test
